# Supplementary material for: Metal-free photocatalytic hydrosilylation of olefins in the presence of photoinitiators
Source: Royal Society of Chemistry journal article supplement (doi:10.1039/d0nj06075e), 2021-01-01

## Metal-Free Photocatalytic Hydrosilylation of Olefins in the Presence of Photoinitiator

Zehao Yu, Zinan Dai, Ying Bai\*, Jiayun Li, Yan Yan and Jiajian Peng\*

Key Laboratory of Organosilicon Chemistry and Material Technology of Ministry of Education,  
Hangzhou Normal University, Hangzhou 311121, China

<sup>1</sup>H, <sup>13</sup>C NMR of product

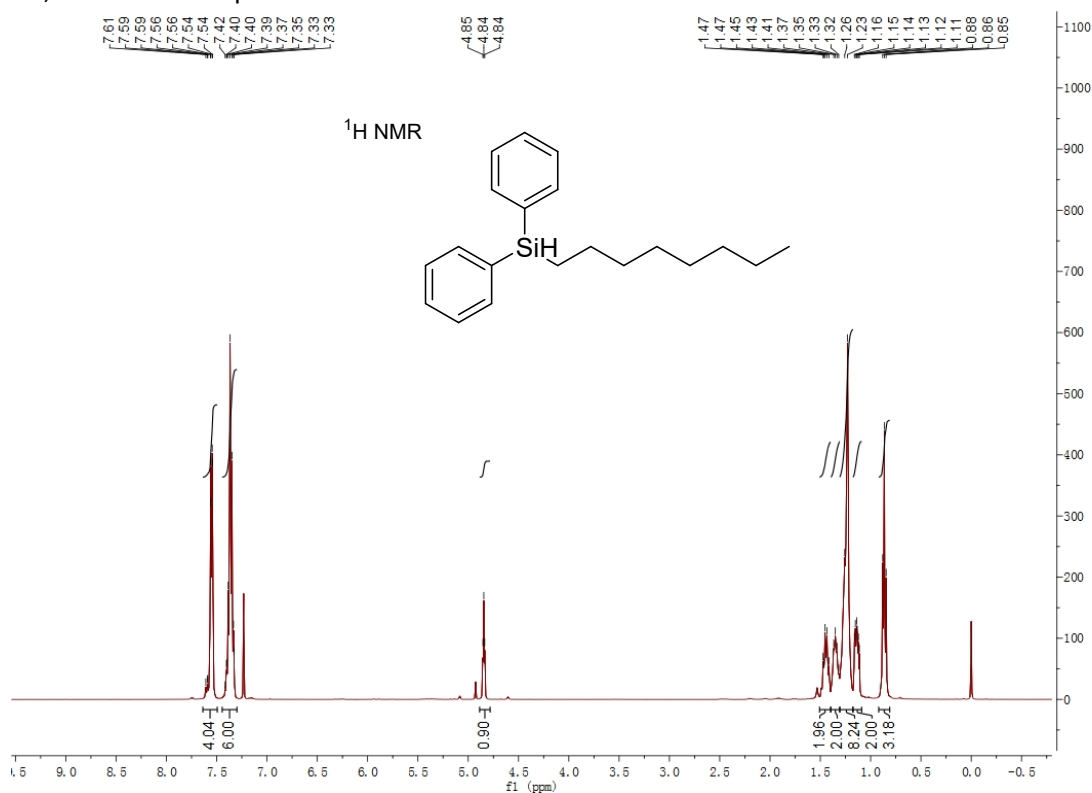

\* Corresponding authors. Fax: +86 571 28865135.

E-mail: ybai@hznu.edu.cn (Y. Bai), jjpeng@hznu.edu.cn (J.J. Peng)

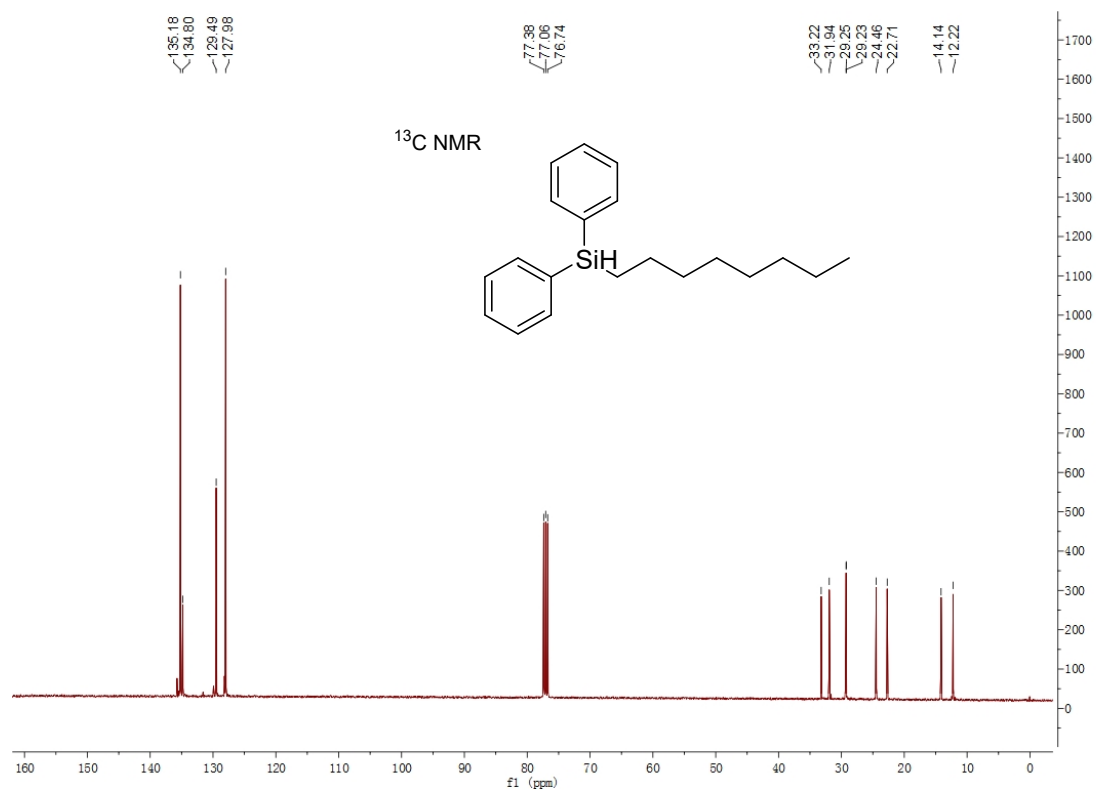

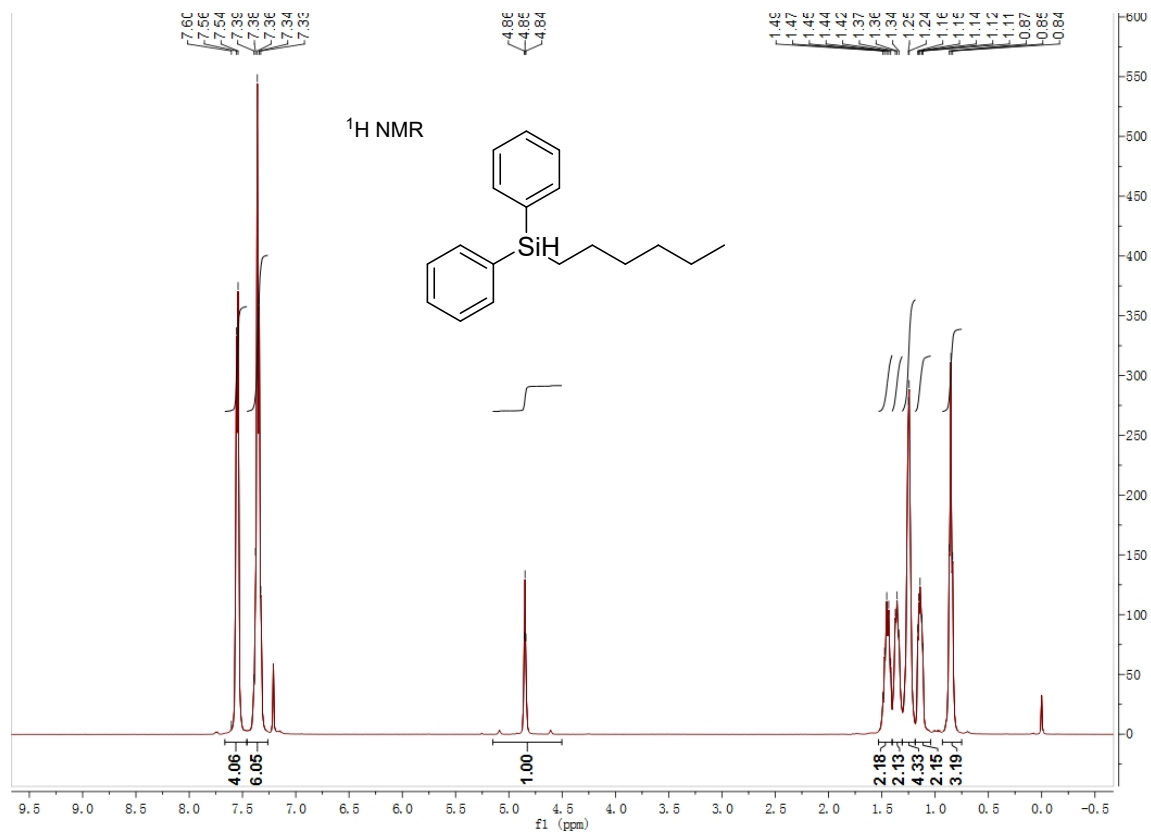

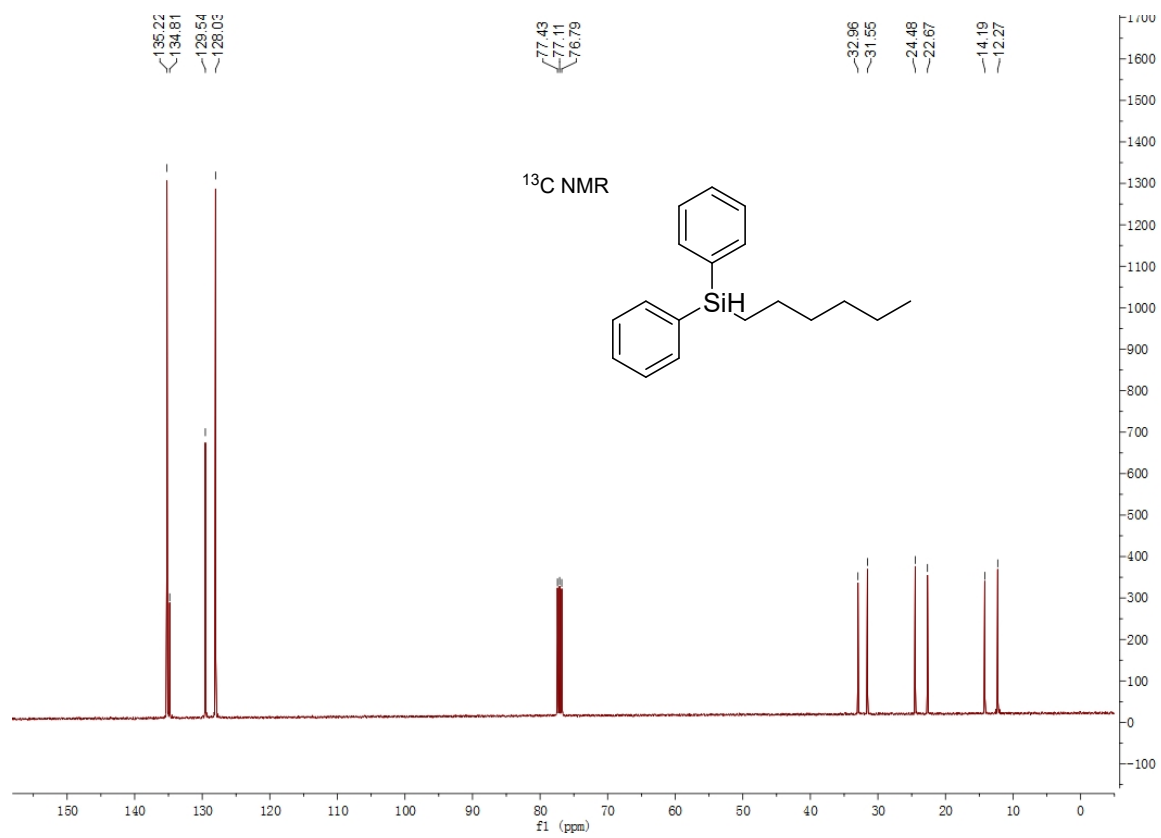

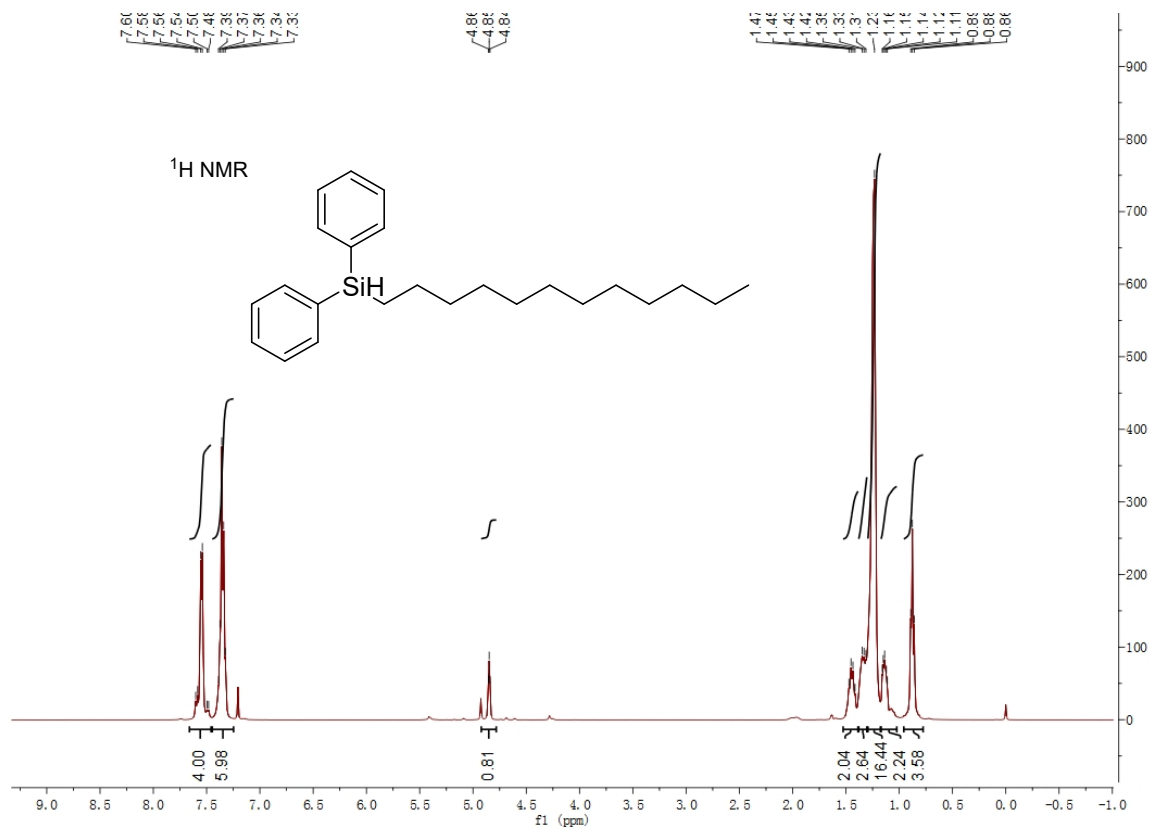

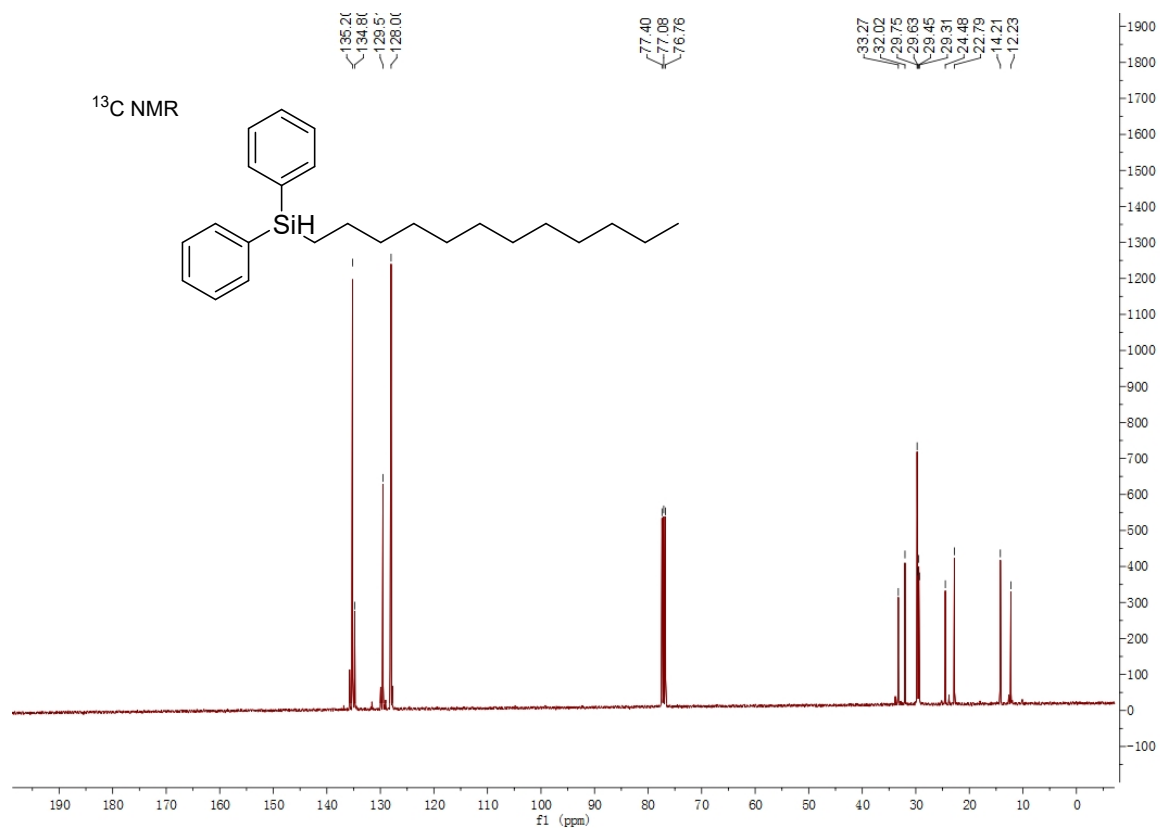

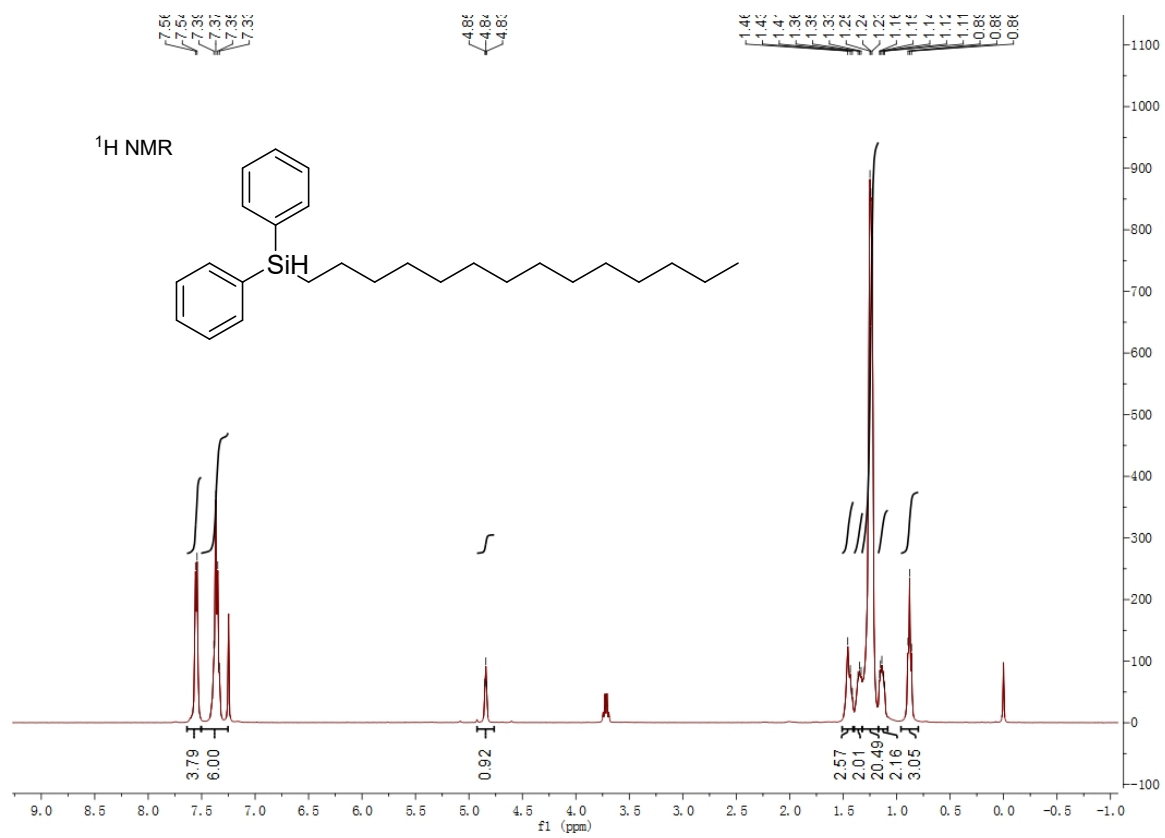

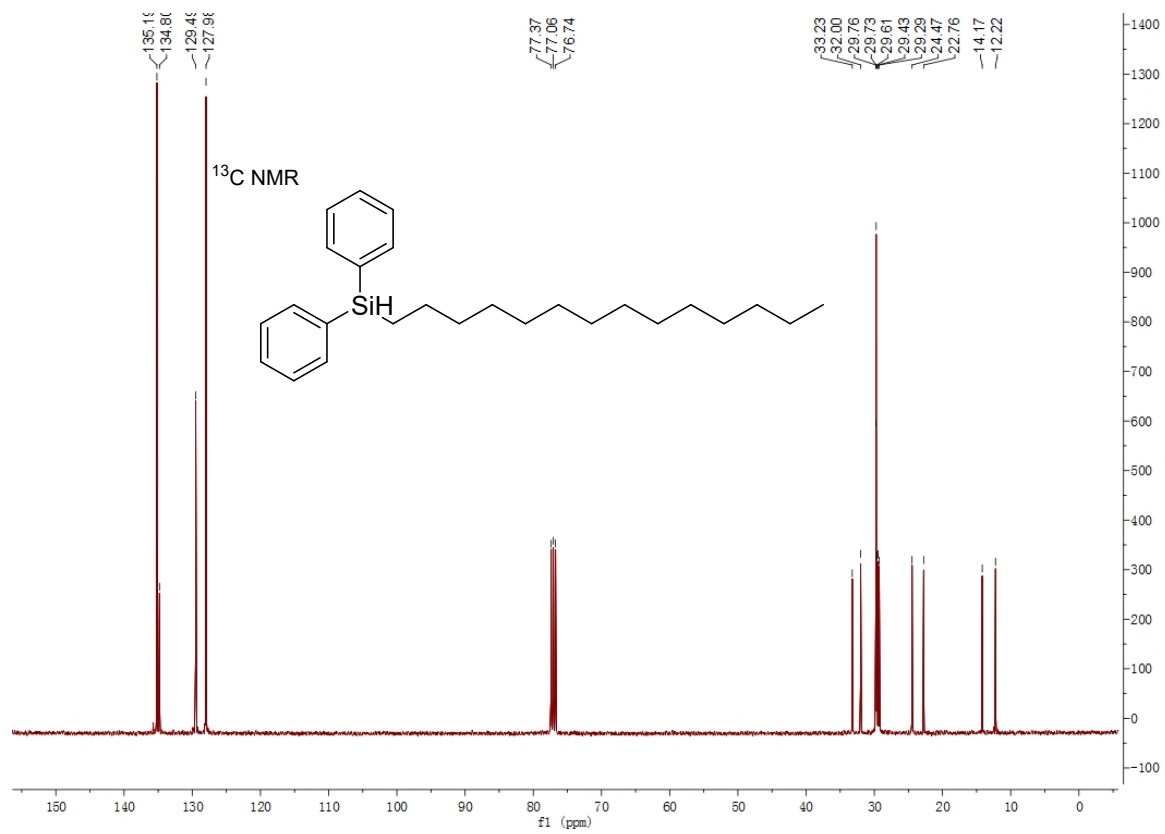



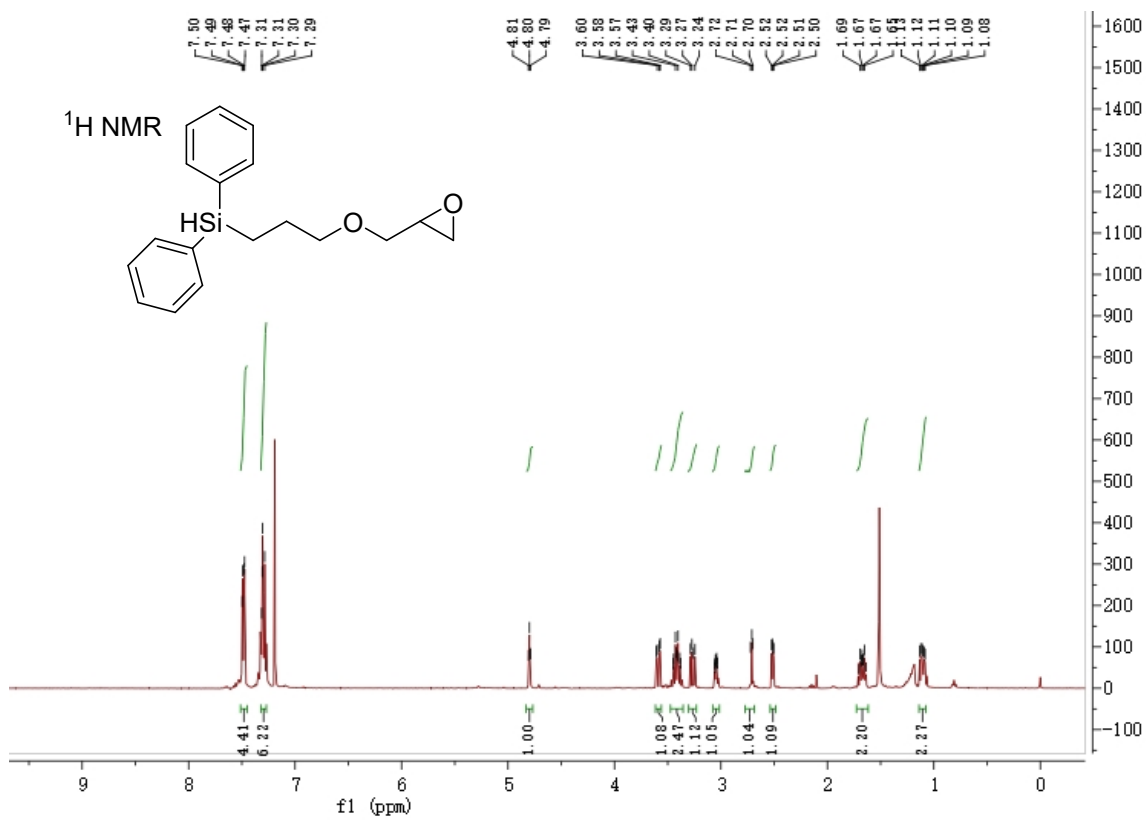

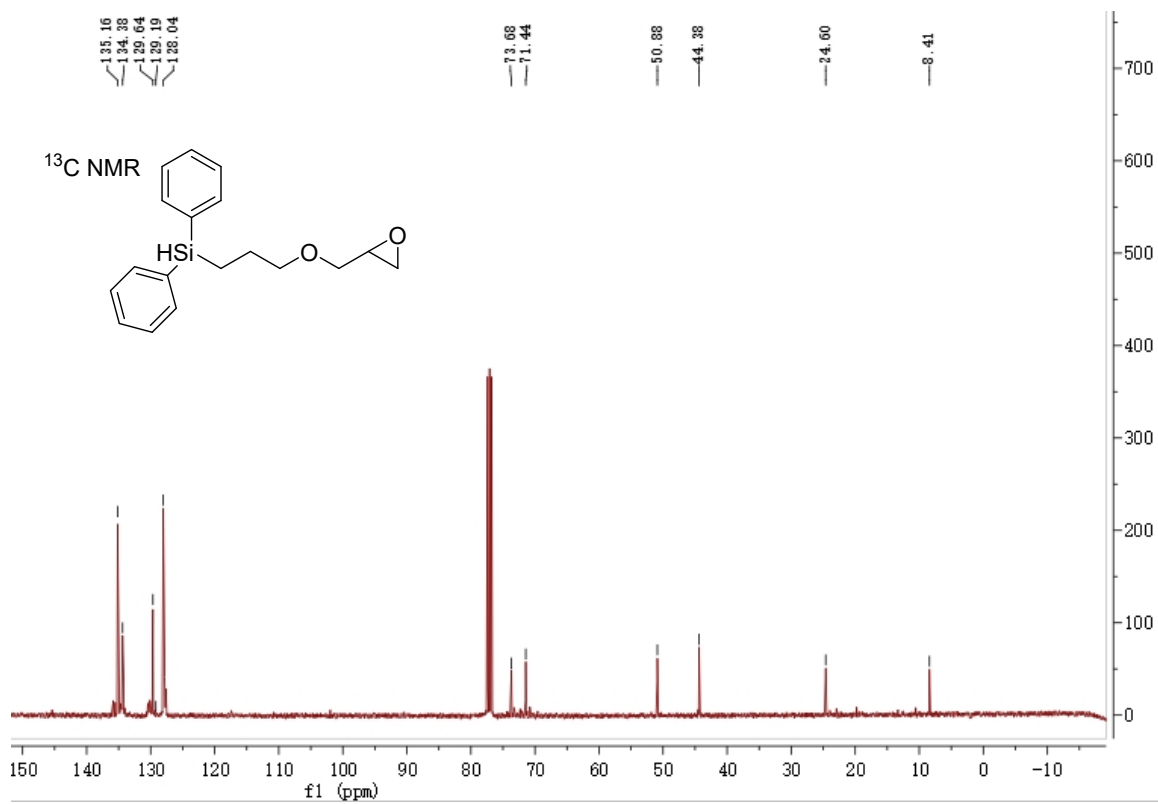

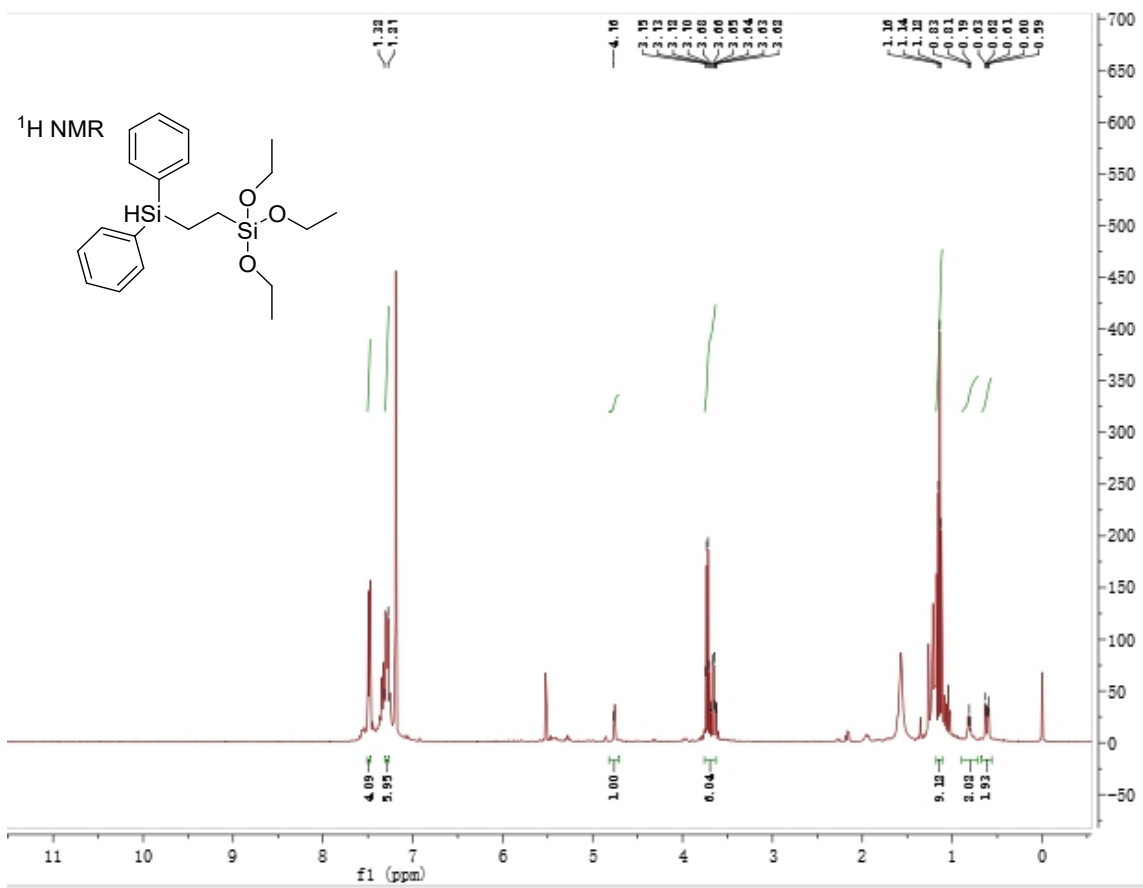

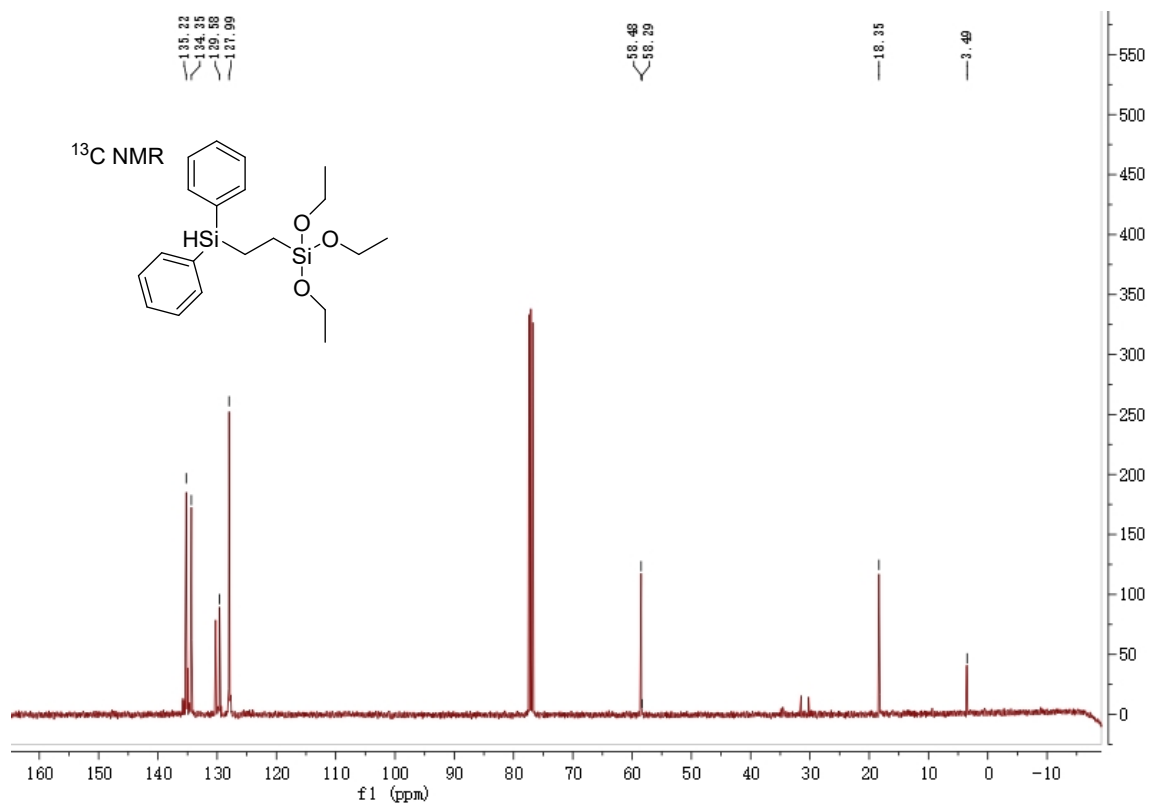

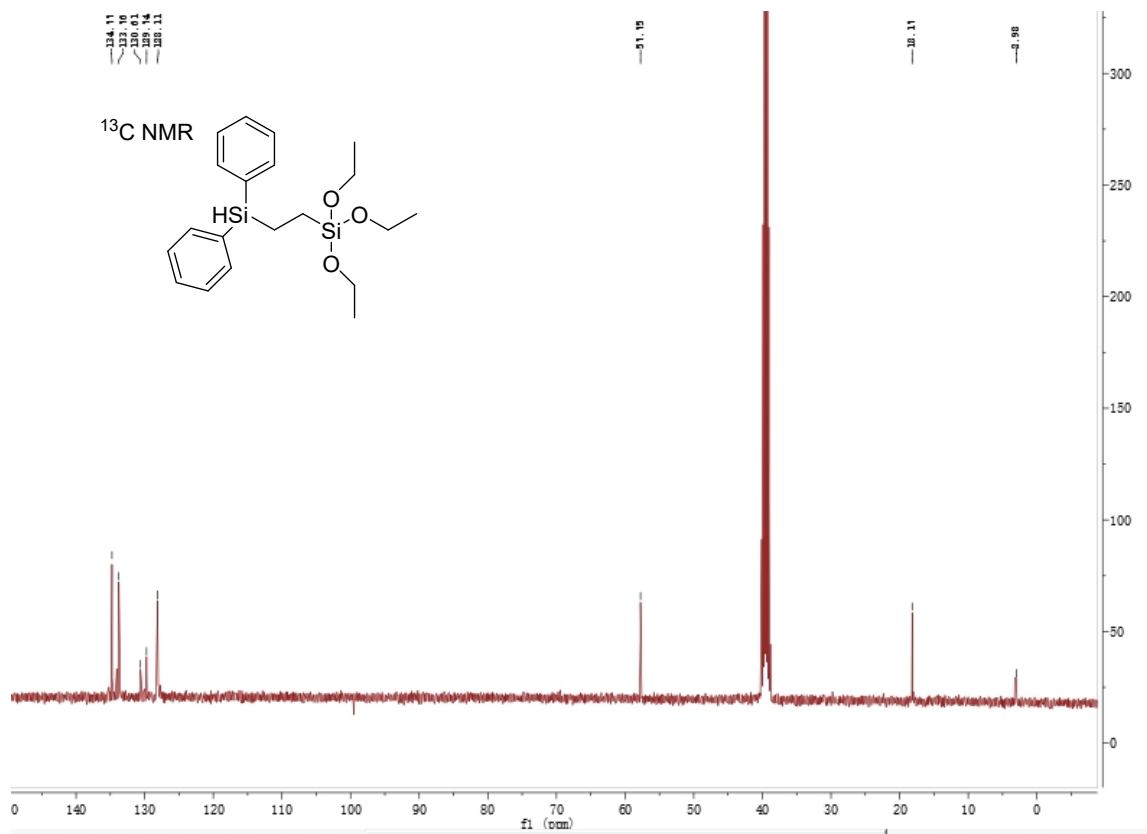

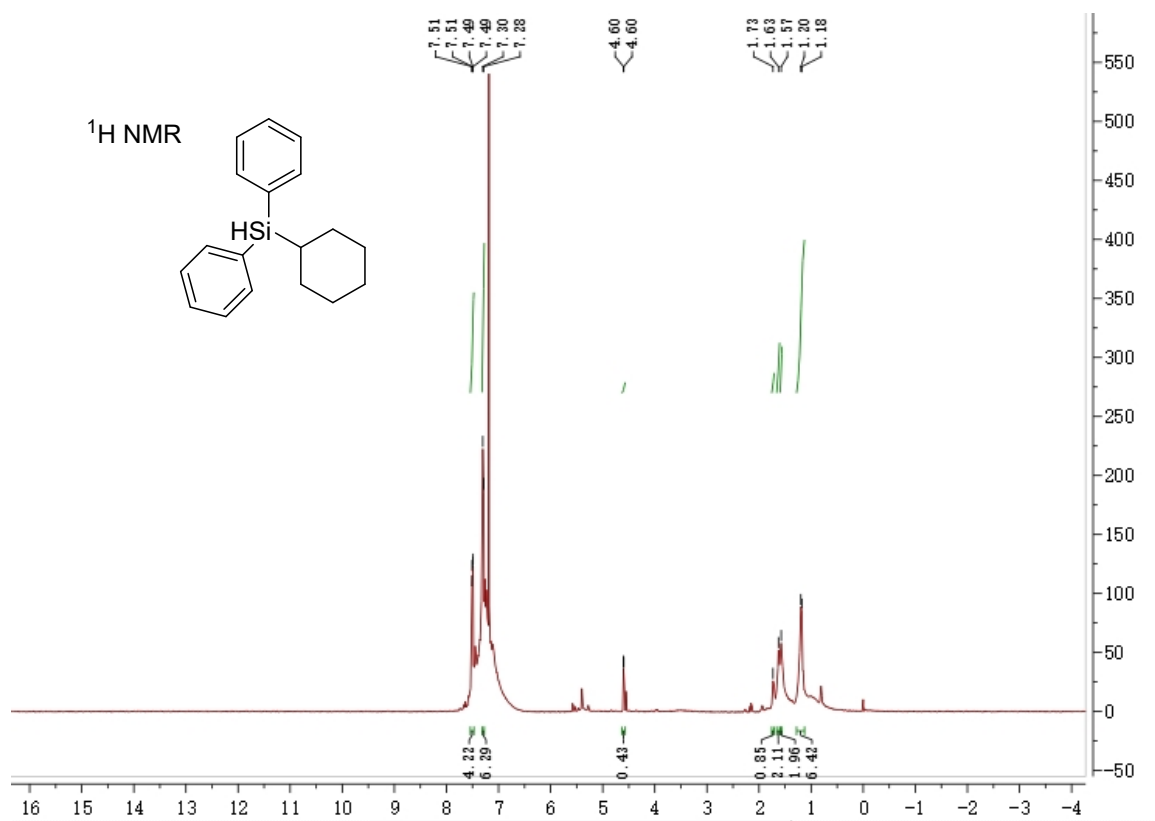

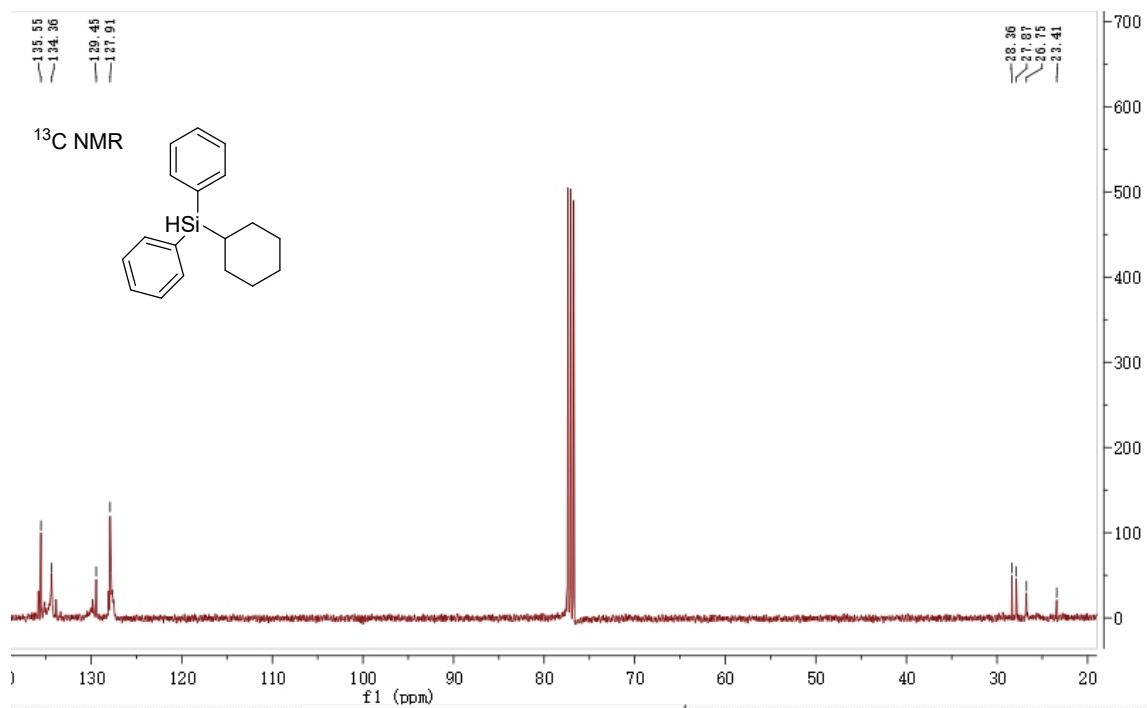

Supplement: d0nj06075e1.pdf [file d0nj06075e1.pdf]
